# Supplementary material for: Self-reported health literacy and medication adherence in older adults: a systematic review
Source: PubMed Central journal article supplement — BMJ Open. 2021 Dec 16;11(12):e056307. doi: 10.1136/bmjopen-2021-056307 (PMC8679075; doi:10.1136/bmjopen-2021-056307), 2021-12-16
Supplement: bmjopen-2021-056307supp005.pdf [file bmjopen-2021-056307supp005.pdf]

| Table S3. Cutoffs and categorization of measures of health literacy and medication adherence |                      |                                                                                                                                                                                                                                         |                                                                                                                     |                                                                                                                                                                                                                      |
|----------------------------------------------------------------------------------------------|----------------------|-----------------------------------------------------------------------------------------------------------------------------------------------------------------------------------------------------------------------------------------|---------------------------------------------------------------------------------------------------------------------|----------------------------------------------------------------------------------------------------------------------------------------------------------------------------------------------------------------------|
| Authors, year                                                                                | HL measures          | Reported range and cutoff/ categories of HL scores                                                                                                                                                                                      | MA measure                                                                                                          | Reported range and cutoff/ categories of MA scores                                                                                                                                                                   |
| Lee <i>et al.</i> , 2013                                                                     | BHLS<br>3 questions  | <u>Range of overall HL scores:</u><br>3-15 with higher scores indicating higher HL<br><br><u>Cutoff/ categories:</u><br>NA                                                                                                              | MMAS-4                                                                                                              | <u>Range of overall MA scores:</u><br>0-4 with higher scores indicating higher MA<br><br><u>Cutoff/ categories:</u><br>MA scores were dichotomized into nonadherence (scores ≤ 2) and adherence (scores ≥ 3)         |
| Lee <i>et al.</i> , 2017                                                                     | BHLS<br>15 questions | <u>Range of overall HL scores:</u><br>15-75 with higher scores indicating higher HL<br><br><u>Cutoff/ categories:</u><br>NA                                                                                                             | MMAS-8                                                                                                              | <u>Range of overall MA scores:</u><br>0-8 with higher scores indicating higher MA<br><br><u>Cutoff/ categories:</u><br>Scores were categorized into high (scores of 8), medium (scores 6-7), and low (scores ≤ 5) MA |
| Lu <i>et al.</i> , 2019                                                                      | HLS-EU-Q16           | <u>Range of overall HL scores:</u><br>0-50 with higher scores indicating higher HL<br><br><u>Cutoff/ categories:</u><br>Scores ≤ 33 indicated limited HL, scores > 34 indicated adequate HL                                             | MOS-SAS                                                                                                             | <u>Range of MA scores:</u><br>0-5 with higher scores indicating higher MA<br><br><u>Cutoff/ categories:</u><br>Scores were dichotomized into adherence (scores ≥ 4) and nonadherence (scores ≤ 3)                    |
| Reading <i>et al.</i> , 2019                                                                 | BHLS<br>3 questions  | <u>Range of overall HL scores:</u><br>3-15 with higher scores indicating higher HL<br><br><u>Cutoff/ categories:</u><br>HL was dichotomized into adequate and inadequate, but no cutoffs were reported                                  | CARDIA<br>(3 questions)                                                                                             | <u>Range of MA scores:</u><br>NA<br><br><u>Cutoff/ categories:</u><br>Nonadherence was defined according to scale for each answer (1. answers “75% of the time” or less; 2. /3. answers “once per week” or more)     |
| Saqlain <i>et al.</i> , 2019                                                                 | SILS                 | <u>Range of overall HL scores:</u><br>1-5 with higher scores indicating lower HL<br><br><u>Cutoff/ categories:</u><br>HL scores ≥ 3 indicated inadequate HL and scores ≤ 2 indicated adequate HL                                        | MMAS-4                                                                                                              | <u>Range of overall MA scores:</u><br>0-4 with higher scores indicating higher MA<br><br><u>Cutoff/ categories:</u><br>MA scores were dichotomized into nonadherence (scores ≤ 3) and adherence (scores of 4)        |
| Seong <i>et al.</i> , 2019                                                                   | BHLS<br>3 questions  | <u>Range of overall HL scores:</u><br>0-12 with higher scores indicating higher HL<br><br><u>Cutoff/ categories:</u><br>HL scores were categorized into inadequate (scores ≤ 6), marginal (scores 7-10), and adequate (scores 11-12) HL | Single item<br>(“In the past week, have you forgotten to take your antithrombotic medication for various reasons?”) | <u>Range of overall MA scores:</u><br>1-5 with higher scores indicating higher MA<br><br><u>Cutoff/ categories:</u><br>MA scores were dichotomized into nonadherence (scores ≤ 5) and adherence (scores of 6)        |
| Shehadeh-Sheeny <i>et al.</i> , 2013                                                         | FCCHL                | <u>Range of overall HL scores:</u><br>NA, higher scores indicating higher HL<br><br><u>Cutoff/ categories:</u><br>HL scores were categorized into low, medium, and high HL, but no cut offs were reported/ are available                | MPR                                                                                                                 | <u>Range of overall MA scores:</u><br>0-1 (0%-100%), higher scores indicating higher MA<br><br><u>Cutoff/ categories:</u><br>MA scores were categorized into low (MPR ≤ 0.2) and high (MPR ≥ 0.8) MA                 |

|                                   |                      |                                                                                                                                                                                                                                              |        |                                                                                                                             |
|-----------------------------------|----------------------|----------------------------------------------------------------------------------------------------------------------------------------------------------------------------------------------------------------------------------------------|--------|-----------------------------------------------------------------------------------------------------------------------------|
| Song & Park, 2020                 | BHLS<br>15 questions | <u>Range of overall HL scores:</u><br>15-75 with higher scores indicating higher HL<br><br><u>Cutoff/ categories:</u><br>NA                                                                                                                  | MMAS-8 | <u>Range of overall MA scores:</u><br>0-8 with higher scores indicating higher MA<br><br><u>Cutoff/ categories:</u><br>NA   |
| Wannasirikul <i>et al.</i> , 2016 | FCCHL                | <u>Range of overall HL scores:</u><br>17-68 with higher scores indicating higher HL<br><br><u>Cutoff/ categories:</u><br>HL scores were categorized into inadequate, marginal, and adequate HL, but no cut offs were reported/ are available | ARMS   | <u>Range of overall MA scores:</u><br>14-56 with higher scores indicating higher MA<br><br><u>Cutoff/ categories:</u><br>NA |

**Abbreviations:** HL: Health literacy, MA: Medication Adherence, BHLS: Brief Health Literacy Screen, MMAS: Morisky Medication Adherence Scale, HLS-EU-Q: European Health Literacy Survey Questionnaire, MOS-SAS: Medical Outcomes Study Specific Adherence Scale, CARDIA: Coronary Artery Risk Development in Young Adults, SILS: Single Item Literacy Screener, FCCHL: Functional, Communicative, and Critical Health Literacy Questionnaire, MPR: Medication Possession Ratio, ARMS: Adherence to Refills and Medications Scale, NA: Not available/ not reported.
